# Supplementary material
Source: publisher figshare collection journal article supplement (https://frontiersin.figshare.com/ndownloader/files/27817239)
Supplement: Supplementary file 1 [file 27817239]

## Sheet: Cork Harbour
Date	Sampling location	Species	Cells/L
2019-06-02	Cobh (CK-CH-CH)	Chaetoceros (Hyalochaete) spp.	9640
		Chaetoceros affinis	20440
		Chaetoceros curvisetus	16840
		Chaetoceros socialis	32000
		Cilliates	1880
		Dactyliosolen spp.	8680
		Dinophysis acuminata	80
		Guinardia flaccida	10360
		Gyrodinium britannicum	40
		Heterocapsa triquetra	2160
		Lauderia / Detonula sp	18760
		Leptocylindrus minimus	21320
		Pleurosigma sp	3280
		Prasinophytes	259038
		Pseudo-nitzschia seriata complex	3880
		Scrippsiella spp.	1800
		Scrippsiella trochoidea	2280
		Thalassiosira anguste-lineata	177606
		Thalassiosira rotula/gravida	12400
		Thalassiosira spp.	16880
		Torodinium robustum	600
2019-06-09	Cobh (CK-CH-CH)	Actinoptychus spp.	400
		Amphiprora spp.	720
		Chaetoceros (Hyalochaete) spp.	2920
		Chaetoceros curvisetus	1000
		Cylindrotheca closterium/ Nitzschia longissima	214110
		Guinardia flaccida	3880
		Guinardia striata	5320
		Navicula spp.	960
		Pleurosigma sp	280
		Rhizosolenia spp.	120
		Thalassiosira rotula/gravida	1720
		Thalassiosira spp.	4880
2019-06-16	Cobh (CK-CH-CH)	Alexandrium spp.	49608
		Azadinium spp.	40
		Ceratium fusus	40
		Chaetoceros (Hyalochaete) spp.	640
		Coscinodiscus spp.	40
		Cylindrotheca closterium/ Nitzschia longissima	120
		Dinophysis acuminata	40
		Dinophysis acuta	40
		Gonyaulax spinifera	40
		Guinardia delicatula	240
		Gymnodinium spp.	280
		Gyrodinium spirale	120
		Heterocapsa spp.	40
		Nematodinium spp.	40
		Paralia sulcata	320
		Phalacroma rotundatum	40
		Protoperidinium spp.	40
		Pseudo-nitzschia delicatissima complex	160
		Pseudo-nitzschia seriata complex	1080
		Rhizosolenia spp.	40
		Scrippsiella spp.	1680
		Tripos lineatus	40
2019-06-23	Cobh (CK-CH-CH)	Alexandrium spp.	1360
		Amphidinium spp.	360
		Armoured dinoflagellate	21120
		Azadinium/heterocapsa spp.	2680
		Cilliates	10280
		Coscinodiscus granii	320
		Coscinodiscus radiatus	120
		Dactyliosolen spp.	560
		Dinophysis acuminata	320
		Dinophysis acuta	480
		Gonyaulax spp.	10680
		Gyrodinium fusiforme	240
		Gyrodinium lachryma	200
		Karenia mikimotoi	13840
		Leptocylindrus minimus	529308
		Oxyrrhis spp.	200
		Prorocentrum micans	720
		Protoperidinium marie-lebouriae	160
		Protoperidinium spp.	680
		Prymnesiophytes	315900
		Pseudo-nitzschia seriata complex	1560
		Scrippsiella spp.	70902
		Skeletonema spp.	246402
		Tintinnids	7080
		Tripos lineatus	2040
2019-06-30	Cobh (CK-CH-CH)	Alexandrium spp.	526872
		Ceratium fusus	600
		Coscinodiscus spp.	920
		Dinophysis acuminata	240
		Dinophysis acuta	640
		Euglena/Eutreptiella spp.	625704
		Gyrodinium spirale	1240
		Karenia mikimotoi	2471168
		Navicula spp.	4680
		Oxyrrhis spp.	280
		Phalacroma rotundatum	80
		Polykrikos kofoidii	560
		Prorocentrum micans	920
		Prorocentrum spp.	73080
		Protoperidinium spp.	800
		Tripos furca	1360
		Tripos lineatus	2280
2019-07-07	Cobh (CK-CH-CH)	Akashiwo sanguinea	280
		Ceratium fusus	160
		Cylindrotheca closterium/ Nitzschia longissima	1640
		Dinophysis acuminata	280
		Dinophysis acuta	240
		Gyrodinium lachryma	440
		Heterocapsa spp.	1560
		Heterocapsa triquetra	2320
		Karenia mikimotoi	760
		Paralia sp.	560
		Paralia sulcata	4560
		Prorocentrum micans	2280
		Protoperidinium spp.	200
		Pseudo-nitzschia seriata complex	960
		Rhizosolenia setigera	160
		Rhizosolenia spp.	280
		Armoured dinoflagellate	2360
		Ceratium fusus	1360
		Chaetoceros (Hyalochaete) spp.	85644
		Chaetoceros debilis	14680
		Chaetoceros socialis	20000
		Cilliates	3880
		Cylindrotheca closterium/ Nitzschia longissima	40160
		Dinobryon spp.	1160
		Dinophysis acuminata	2560
		Dinophysis acuta	1040
		Guinardia delicatula	16240
		Gyrodinium lachryma	1960
		Gyrodinium spp.	480
		Karenia mikimotoi	117234
		Leptocylindrus mediterraneus	3680
		Navicula spp.	5240
		Oxyrrhis spp.	2240
		Oxytoxum spp.	2840
		Phalacroma rotundatum	280
		Pleurosigma sp	2840
		Prorocentrum micans	2440
		Protoperidinium spp.	480
		Protoperidinium steinii	440
		Pseudo-nitzschia delicatissima complex	13160
		Pseudo-nitzschia seriata complex	4360
		Rhizosolenia spp.	18480
		Scrippsiella spp.	1760
		Thalassiosira rotula/gravida	7880
		Thalassiosira spp.	45120
		Tripos furca	920
		Tripos lineatus	3880
2019-07-28	Cobh (CK-CH-CH)	Ceratium fusus	960
		Cylindrotheca closterium/ Nitzschia longissima	3760
		Dinophysis acuminata	680
		Dinophysis acuta	360
		Karenia mikimotoi	257634
		Leptocylindrus minimus	18440
		Noctiluca scintillans	120
		Polykrikos kofoidii	400
		Prorocentrum micans	3360
		Pseudo-nitzschia seriata complex	9360
		Scrippsiella spp.	560
		Scrippsiella trochoidea	1800
		Skeletonema spp.	26280
		Thalassiosira nordenskioeldii	5320
		Tripos furca	6560
2019-08-04	Cobh (CK-CH-CH)	Armoured dinoflagellate	560
		Chaetoceros (Hyalochaete) spp.	1840
		Cylindrotheca closterium/ Nitzschia longissima	12200
		Detonula confervacea	20920
		Dinophysis acuminata	600
		Dinophysis acuta	400
		Karenia mikimotoi	12960
		Leptocylindrus minimus	18440
		Oxyrrhis spp.	400
		Prorocentrum micans	680
		Prorocentrum triestinum	720
		Rhizosolenia spp.	2840
		Rhizosolenia styliformis	680
		Scrippsiella spp.	480
		Thalassiosira nordenskioeldii	600
		Thalassiosira spp.	560
		Tintinnids	920
		Tripos furca	160
2019-08-11	Cobh (CK-CH-CH)	Amphiprora spp.	2680
		Chaetoceros (Hyalochaete) spp.	72384
		Dinophysis acuminata	80
		Dinophysis acuta	80
		Karenia mikimotoi	868770
		Leptocylindrus minimus	1563786
		Oxyrrhis spp.	480
		Pleurosigma sp	1400
		Prorocentrum micans	480
		Prorocentrum triestinum	92568
		Protoperidinium spp.	160
		Rhizosolenia spp.	640
		Rhizosolenia styliformis	160
		Scrippsiella spp.	5320
		Scrippsiella trochoidea	4280
		Thalassiosira rotula/gravida	2280
		Tripos furca	120
2019-08-18	Cobh (CK-CH-CH)	Alexandrium spp.	2240
		Amphidinium spp.	40
		Armoured dinoflagellate	1520
		Centric diatom	320
		Ceratium spp.	40
		Cilliates	280
		Cylindrotheca closterium/ Nitzschia longissima	73776
		Dinophysis acuminata	120
		Diplopsalis spp.	640
		Gyrodinium spirale	40
		Heterocapsa triquetra	40
		Karenia mikimotoi	200
		Lauderia / Detonula sp	160
		Leptocylindrus danicus	2160
		Leptocylindrus minimus	1312808
		Mesodinium rubrum	800
		Naked dinoflagellate	1520
		Nematodinium spp.	80
		Paralia sp.	1000
		Pennate diatom	200
		Pleurosigma/Gyrosigma	480
		Polykrikos spp.	440
		Prorocentrum balticum/minimum	40
		Prorocentrum micans	280
		Prorocentrum spp.	53592
		Protoperidinium spp.	80
		Pseudo-nitzschia seriata complex	280
		Rhizosolenia spp.	1040
		Scrippsiella spp.	88392
		Tintinnids	40
2019-08-25	Cobh (CK-CH-CH)	Asterionellopsis glacialis	23880
		Ceratium fusus	40
		Ceratium tripos	80
		Cilliates	1800
		Dinobryon spp.	120
		Karenia mikimotoi	120
		Leptocylindrus minimus	36640
		Prorocentrum micans	280
		Pseudo-nitzschia seriata complex	4640
		Scrippsiella trochoidea	960
		Skeletonema costatum	8200
		Thalassiosira rotula/gravida	560
		Tintinnids	2880

## Sheet: Oysterhaven
Date	Sampling location	Species	Cells/L
2019-06-02	Oysterhaven (CK-ON-ON)	Amphiprora spp.	560
		Cilliates	1680
		Coscinodiscus radiatus	160
		Heterocapsa triquetra	680
		Karenia mikimotoi	120
		Leptocylindrus danicus	16880
		Leptocylindrus minimus	6280
		Licmophora spp.	3280
		Pennate diatom	4160
		Pseudo-nitzschia seriata complex	1880
		Skeletonema costatum	8160
		Skeletonema spp.	7080
		Tintinnids	480
2019-06-16	Oysterhaven (CK-ON-ON)	Alexandrium spp.	80
		Armoured dinoflagellate	440
		Azadinium/heterocapsa spp.	440
		Cerataulina spp.	1360
		Ceratium fusus	320
		Coccolithophorids	160
		Cylindrotheca closterium/ Nitzschia longissima	960
		Dinophysis acuminata	40
		Dinophysis acuta	200
		Gyrodinium lachryma	560
		Karenia mikimotoi	2160
		Leptocylindrus minimus	5400
		Licmophora spp.	2560
		Phalacroma rotundatum	80
		Protoperidinium spp.	80
		Pseudo-nitzschia seriata complex	4920
		Scrippsiella trochoidea	480
		Tripos lineatus	2200
2019-06-30	Oysterhaven (CK-ON-ON)	Armoured dinoflagellate	1240
		Ceratium fusus	160
		Chaetoceros (Hyalochaete) spp.	5640
		Dinophysis acuminata	480
		Dinophysis acuta	680
		Gyrodinium lachryma	2680
		Heterocapsa spp.	4200
		Heterocapsa triquetra	1280
		Karenia mikimotoi	71688
		Oxyrrhis spp.	2080
		Paralia sulcata	1880
		Phalacroma rotundatum	120
		Polykrikos kofoidii	3760
		Prymnesiophytes	164952
		Scrippsiella spp.	2240
		Scrippsiella trochoidea	3480
		Thalassiosira rotula/gravida	600
2019-07-07	Oysterhaven (CK-ON-ON)	Armoured dinoflagellate	4320
		Dinophysis acuminata	600
		Dinophysis acuta	560
		Euglena/Eutreptiella spp.	3880
		Gymnodinium spp.	4160
		Gyrodinium lachryma	1880
		Heterocapsa spp.	1080
		Heterocapsa triquetra	560
		Karenia mikimotoi	70992
		Karenia spp.	6280
		Microcystis (colony)	120
		Navicula spp.	680
		Noctiluca scintillans	80
		Paralia sp.	2240
		Paralia sulcata	4080
		Phalacroma rotundatum	80
		Protoperidinium spp.	200
		Rhizosolenia setigera	400
		Rhizosolenia spp.	600
		Skeletonema spp.	122496
		Striatella unipunctata	3320
		Thalassiosira rotula/gravida	5480
		Thalassiosira spp.	178872
		Tripos furca	1520
		Tripos lineatus	2920
2019-07-14	Oysterhaven (CK-ON-ON)	Akashiwo sanguinea	280
		Armoured dinoflagellate	5000
		Azadinium/heterocapsa spp.	4880
		Cerataulina spp.	2560
		Ceratium trichoceros	80
		Cylindrotheca closterium/ Nitzschia longissima	87000
		Dinophysis acuminata	80
		Dinophysis acuta	400
		Euglena/Eutreptiella spp.	96744
		Heterocapsa spp.	12720
		Karenia mikimotoi	255432
		Navicula spp.	3520
		Paralia sp.	9480
		Paralia sulcata	8280
		Polykrikos kofoidii	4960
		Prorocentrum micans	2960
		Protoperidinium quinquecorne	41040
		Protoperidinium spp.	1360
		Rhizosolenia spp.	4320
		Rhizosolenia styliformis	3520
		Striatella unipunctata	8640
		Tintinnids	8760
2019-07-21	Oysterhaven (CK-ON-ON)	Actinoptychus spp.	760
		Ceratium fusus	1360
		Chaetoceros (Hyalochaete) spp.	14440
		Chaetoceros affinis	18280
		Coscinodiscus centralis	200
		Coscinodiscus granii	80
		Coscinodiscus spp.	120
		Dinophysis acuminata	2560
		Dinophysis acuta	1280
		Favella ehrenbergii	160
		Gyrodinium lachryma	1240
		Gyrodinium spirale	200
		Gyrodinium spp.	880
		Karenia mikimotoi	240
		Karenia spp.	160
		Noctiluca scintillans	200
		Oxyrrhis spp.	640
		Paralia sulcata	280
		Phalacroma rotundatum	80
		Prorocentrum micans	15240
		Protoperidinium spp.	400
		Pseudo-nitzschia seriata complex	4200
		Rhizosolenia spp.	9640
		Rhizosolenia styliformis	4200
		Scrippsiella spp.	840
		Scrippsiella trochoidea	760
		Thalassiosira rotula/gravida	480
		Tintinnids	1200
		Tripos furca	3920
		Tripos lineatus	2360
		Tripos longipes	240
2019-07-28	Oysterhaven (CK-ON-ON)	Ceratium fusus	160
		Dinophysis acuminata	320
		Dinophysis acuta	80
		Leptocylindrus minimus	153036
		Prorocentrum micans	2760
		Protoperidinium quinquecorne	160
		Protoperidinium spp.	200
		Pseudo-nitzschia seriata complex	2680
		Rhizosolenia setigera	1040
		Rhizosolenia spp.	3880
		Tintinnids	55440
		Tripos furca	480
2019-08-04	Oysterhaven (CK-ON-ON)	Armoured dinoflagellate	3880
		Azadinium/heterocapsa spp.	480
		Ceratium fusus	200
		Cilliates	2240
		Cylindrotheca closterium/ Nitzschia longissima	7520
		Dinophysis acuminata	120
		Heterocapsa triquetra	1160
		Karenia mikimotoi	3360
		Leptocylindrus minimus	24440
		Navicula spp.	1760
		Noctiluca scintillans	200
		Odontella spp.	14640
		Paralia sp.	4280
		Paralia sulcata	8760
		Phalacroma rotundatum	80
		Prorocentrum micans	1200
		Protoperidinium quinquecorne	20640
		Pseudo-nitzschia seriata complex	8560
		Scrippsiella spp.	4960
		Scrippsiella trochoidea	3640
		Striatella unipunctata	640
		Tintinnids	2240
		Tripos furca	240
		Tripos lineatus	160
2019-08-11	Oysterhaven (CK-ON-ON)	Amphiprora spp.	1200
		Cilliates	1680
		Detonula sp.	218544
		Euglena/Eutreptiella spp.	5680
		Gymnodinium spp.	1280
		Karenia mikimotoi	1640
		Karenia spp.	680
		Katodinium spp.	600
		Leptocylindrus minimus	117624
		Licmophora spp.	3600
		Navicula spp.	16200
		Paralia sulcata	1320
		Pennate diatom	16760
		Prorocentrum micans	1880
		Pseudo-nitzschia seriata complex	6920
		Rhizosolenia setigera	160
		Rhizosolenia spp.	880
		Scrippsiella spp.	2880
		Scrippsiella trochoidea	3200
		Skeletonema spp.	13084
2019-08-25	Oysterhaven (CK-ON-ON)	Cilliates	1040
		Lauderia / Detonula sp	178872
		Leptocylindrus danicus	72384
		Leptocylindrus minimus	297192
		Prasinophytes	70296
		Prorocentrum micans	80
		Protoperidinium quinquecorne	200
		Pseudo-nitzschia delicatissima complex	22920
		Pseudo-nitzschia seriata complex	16240
		Rhizosolenia setigera	600
		Rhizosolenia spp.	1080
		Scrippsiella spp.	3680
		Scrippsiella trochoidea	960
		Striatella unipunctata	120
		Thalassiosira nordenskioeldii	7520
		Thalassiosira rotula/gravida	680
		Thalassiosira spp.	5280
		Tintinnids	2040

## Sheet: Kinsale
Date	Sampling location	Species	Cells/L
2019-06-02	Kinsale Bridge (CK-KE-KB)	Actinoptychus spp.	Present
		Armoured dinoflagellate	Present
		Azadinium/heterocapsa spp.	440
		Chaetoceros (Hyalochaete) spp.	Present
		Chaetoceros curvisetus	Present
		Chaetoceros debilis	Present
		Chaetoceros socialis	Present
		Dinophysis acuminata	160
		Dinophysis acuta	120
		Gonyaulax spp.	Present
		Gonyaulax verior	Present
		Gyrodinium lachryma	Present
		Haptophytes	Present
		Heterocapsa triquetra	Present
		Karenia mikimotoi	160
		Lauderia / Detonula sp	Present
		Navicula spp.	Present
		Nitzschia spp.	Present
		Protoperidinium spp.	280
		Prymnesiophytes	Present
		Pseudo-nitzschia seriata complex	1880
		Scrippsiella spp.	Present
		Scrippsiella trochoidea	Present
		Skeletonema costatum	Present
		Skeletonema spp.	Present
		Thalassiosira nordenskioeldii	Present
		Thalassiosira spp.	Present
		Tintinnids	Present
2019-06-16	Kinsale Bridge (CK-KE-KB)	Alexandrium spp.	400
		Armoured dinoflagellate	Present
		Azadinium/heterocapsa spp.	680
		Centric diatom	Present
		Ceratium fusus	Present
		Chaetoceros (Hyalochaete) spp.	Present
		Chaetoceros curvisetus	Present
		Chaetoceros debilis	Present
		Chaetoceros socialis	Present
		Dinophysis acuminata	400
		Dinophysis acuta	200
		Guinardia flaccida	Present
		Gyrodinium lachryma	Present
		Karenia mikimotoi	22760
		Mesodinium rubrum	Present
		Navicula spp.	Present
		Phalacroma rotundatum	40
		Prorocentrum micans	Present
		Protoperidinium bipes	240
		Protoperidinium spp.	1840
		Scrippsiella spp.	Present
		Scrippsiella trochoidea	Present
		Thalassiosira anguste-lineata	Present
		Thalassiosira rotula/gravida	Present
		Thalassiosira spp.	Present
		Tintinnids	Present
		Tripos furca	Present
2019-06-23	Kinsale Bridge (CK-KE-KB)	Amphidinium spp.	120
		Azadinium/heterocapsa spp.	1160
		Ceratium horridum	Present
		Chaetoceros socialis	Present
		Dinophysis acuminata	160
		Dinophysis acuta	840
		Gyrodinium britannicum	Present
		Gyrodinium fusiforme	Present
		Gyrodinium lachryma	Present
		Gyrodinium spirale	6040
		Heterocapsa spp.	10760
		Karenia mikimotoi	5320
		Phalacroma rotundatum	80
		Pleurosigma angulatum	Present
		Pleurosigma sp	Present
		Prorocentrum micans	Present
		Prorocentrum triestinum	Present
		Protoperidinium brevipes	600
		Protoperidinium marie-lebouriae	280
		Protoperidinium spp.	280
		Pseudo-nitzschia seriata complex	3720
		Scrippsiella spp.	Present
		Scrippsiella trochoidea	Present
		Thalassiosira nordenskioeldii	Present
		Thalassiosira rotula/gravida	Present
		Torodinium robustum	Present
2019-06-30	Kinsale Bridge (CK-KE-KB)	Actinoptychus spp.	Present
		Alexandrium spp.	320
		Ceratium fusus	Present
		Cylindrotheca closterium/ Nitzschia longissima	Present
		Dinophysis acuminata	160
		Dinophysis acuta	1240
		Gyrodinium lachryma	Present
		Gyrodinium spirale	2080
		Heterocapsa spp.	600
		Heterocapsa triquetra	Present
		Karenia mikimotoi	31320
		Leptocylindrus minimus	Present
		Noctiluca scintillans	80
		Oxyrrhis spp.	Present
		Pennate diatom	Present
		Phalacroma rotundatum	80
		Pleurosigma sp	Present
		Polykrikos kofoidii	Present
		Protoperidinium spp.	1080
		Scrippsiella spp.	Present
		Scrippsiella trochoidea	Present
		Skeletonema costatum	Present
		Skeletonema spp.	Present
2019-07-14	Kinsale Bridge (CK-KE-KB)	Alexandrium spp.	280
		Armoured dinoflagellate	Present
		Azadinium/heterocapsa spp.	600
		Cerataulina pelagica	Present
		Coscinodiscus granii	Present
		Dinophysis acuminata	2560
		Dinophysis acuta	360
		Dinophysis spp.	440
		Gyrodinium lachryma	Present
		Heterocapsa spp.	6200
		Karenia mikimotoi	70902
		Prorocentrum micans	Present
		Protoperidinium quinquecorne	2160
		Protoperidinium spp.	1040
		Pseudo-nitzschia delicatissima complex	11760
		Pseudo-nitzschia seriata complex	5160
		Scrippsiella spp.	Present
		Scrippsiella trochoidea	Present
		Thalassiosira rotula/gravida	Present
		Tintinnids	Present
		Tripos furca	Present
2019-07-21	Kinsale Bridge (CK-KE-KB)	Ceratium fusus	Present
		Dictyocha fibula	160
		Dinophysis acuminata	160
		Dinophysis acuta	160
		Diploneis spp.	Present
		Karenia mikimotoi	400
		Karenia spp.	80
		Licmophora spp.	Present
		Melosira spp.	Present
		Navicula spp.	Present
		Plagiogrammopsis spp.	Present
		Pleurosigma angulatum	Present
		Pleurosigma sp	Present
		Protoperidinium depressum	80
		Pseudo-nitzschia delicatissima complex	2400
		Striatella unipunctata	Present
		Tripos furca	Present
2019-07-28	Kinsale Bridge (CK-KE-KB)	Akashiwo sanguinea	80
		Ceratium fusus	Present
		Dinophysis acuminata	560
		Dinophysis acuta	520
		Eucampia zodiacus	Present
		Guinardia delicatula	Present
		Karenia mikimotoi	398736
		Leptocylindrus danicus	Present
		Leptocylindrus minimus	Present
		Navicula spp.	Present
		Noctiluca scintillans	200
		Prorocentrum micans	Present
		Protoperidinium spp.	160
		Rhizosolenia spp.	Present
		Thalassiosira rotula/gravida	Present
		Tintinnids	Present
		Tripos furca	Present
		Tripos lineatus	Present
2019-08-04	Kinsale Bridge (CK-KE-KB)	Actinoptychus spp.	Present
		Akashiwo sanguinea	680
		Bacillaria paxillifera	Present
		Dinophysis acuta	80
		Euglena/Eutreptiella spp.	Present
		Guinardia flaccida	Present
		Navicula spp.	Present
		Noctiluca scintillans	920
		Prorocentrum micans	Present
		Prorocentrum triestinum	Present
		Protoperidinium spp.	160
		Thalassiosira rotula/gravida	Present
		Tripos furca	Present
		Tripos lineatus	Present
		Tripos macroceros	Present
2019-08-11	Kinsale Bridge (CK-KE-KB)	Akashiwo sanguinea	30040
		Alexandrium spp.	3480
		Armoured dinoflagellate	Present
		Cilliates	Present
		Coscinodiscus centralis	Present
		Coscinodiscus spp.	Present
		Dactyliosolen fragilissimus	Present
		Dinophysis acuminata	80
		Euglena/Eutreptiella spp.	Present
		Guinardia flaccida	Present
		Gymnodinium spp.	Present
		Gyrodinium lachryma	Present
		Heterocapsa triquetra	Present
		Karenia mikimotoi	2440
		Navicula spp.	Present
		Noctiluca scintillans	40
		Paralia sp.	Present
		Paralia sulcata	Present
		Pennate diatom	Present
		Prorocentrum micans	Present
		Prorocentrum triestinum	Present
		Protoperidinium spp.	440
		Prymnesiophytes	Present
		Scrippsiella spp.	Present
		Scrippsiella trochoidea	Present
		Thalassiosira rotula/gravida	Present
		Tintinnids	Present
		Tripos furca	Present
2019-08-18	Kinsale Bridge (CK-KE-KB)	Alexandrium spp.	880
		Armoured dinoflagellate	Present
		Cylindrotheca closterium/ Nitzschia longissima	Present
		Dactyliosolen fragilissimus	Present
		Diplopsalis spp.	Present
		Heterocapsa triquetra	Present
		Lauderia / Detonula sp	Present
		Leptocylindrus minimus	Present
		Mesodinium rubrum	Present
		Paralia sp.	Present
		Pennate diatom	Present
		Pleurosigma/Gyrosigma	Present
		Polykrikos spp.	Present
		Protoperidinium spp.	40
		Pseudo-nitzschia seriata complex	280
		Rhizosolenia spp.	Present
		Scrippsiella spp.	Present
		Skeletonema spp.	Present
		Striatella spp.	Present
2019-08-25	Kinsale Bridge (CK-KE-KB)	Actinoptychus spp.	Present
		Alexandrium spp.	2200
		Armoured dinoflagellate	Present
		Detonula confervacea	Present
		Lauderia / Detonula sp	Present
		Leptocylindrus minimus	Present
		Odontella spp.	Present
		Plagiogrammopsis spp.	Present
		Pleurosigma angulatum	Present
		Pseudo-nitzschia delicatissima complex	1760
		Pseudo-nitzschia seriata complex	720
		Scrippsiella spp.	Present
		Scrippsiella trochoidea	Present
		Skeletonema costatum	Present
